**TITLE** SUPEROXIDE PRODUCTION BY STIMULATED ENDOTHELIAL CELLS EXPOSED TO VARYING HALOTHANE CONCENTRATIONS

**AUTHORS** SH Noorily, M.D., JR Shayevitz, M.D., J Varani, M.S., Ph.D.

**AFFILIATION** Department of Anesthesiology, University of Michigan Medical School, Ann Arbor, MI 48109.

Vascular endothelium produces superoxide anion ( $O_2^-$ ) when exposed to soluble or particulate stimuli. Halothane (Hal) has been known to inhibit  $O_2^-$  production by stimulated neutrophils.<sup>1</sup> In contrast, volatile anesthetics have been found to enhance oxidant-induced endothelial injury.<sup>2</sup> Given this finding, and the assumption that endothelial cell production of  $O_2^-$  is related to injury, we expected to find that Hal enhanced  $O_2^-$  production.

Rat pulmonary artery endothelial cells (RPAECs) were isolated as described elsewhere,<sup>3</sup> and cultured into monolayers on microcarriers ( $\mu$ c) in Minimal Essential Media containing 10% fetal calf serum. Ten million RPAECs added to two million  $\mu$ c took 5–6 days to grow to confluence. The final culture contained 160 million cells. At confluence, the  $\mu$ c were washed in Hanks Balanced Salt Solution, 0.2% BSA, and aliquoted to test tubes so that each contained 750,000 cells. Tubes were equilibrated with either carrier gas (5%  $CO_2$  in air) or Hal (0.5, 2, or 3 MAC) for 10 minutes. Half of each group of cells were stimulated with phorbol myristate acetate (PMA), 1  $\mu$ g/cc. All tubes were then incubated for 1 hour at 37°C.  $O_2^-$  production was measured by reduction of ferricytochrome C, as described elsewhere, using an extinction coefficient of 18.5/cm $\cdot$ mM.<sup>4</sup>

Values for  $O_2^-$  production were analyzed by 2-way ANOVA. If the F-ratio was significant ( $p < 0.05$ ), between-group comparisons were made

using 1-way ANOVA and Dunnett's test. The  $O_2^-$  content in the medium was decreased significantly for PMA-stimulated cells exposed to Hal 2 and 3 MAC. Values shown in the figure represent mean  $\pm$  s.e. for 12 experiments.

In conclusion, Hal was found to inhibit the release of  $O_2^-$  into the medium by PMA-stimulated cells. This could be a result of inhibited  $O_2^-$  release or production. Possible mechanisms for inhibited  $O_2^-$  production are inhibition of the xanthine dehydrogenase to xanthine oxidase conversion or inhibition of purine metabolism.

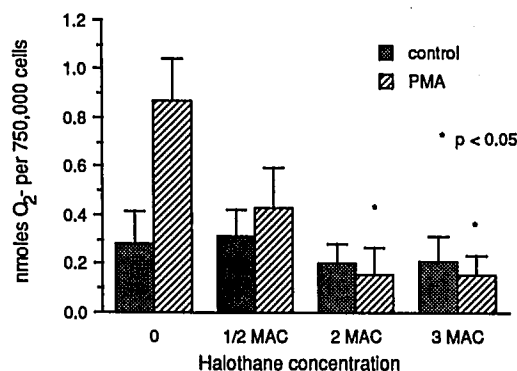

<sup>1</sup> *Anesthesiology* 64:4-12, 1986.

<sup>2</sup> *Anesthesiology* 71:A212, 1989.

<sup>3</sup> *J Tissue Cult Methods* 10:9-13, 1986.

<sup>4</sup> *J Clin Invest* 52:741-745, 1973.

A404

**TITLE:** EFFECTS OF HALOTHANE ON PHOSPHOLIPID N-METHYLATION IN RAT BRAIN SYNAPTOSOMES

**Authors:** JJ Franks, MD, BVR Sastry, Ph.D., JR Kambam, MD, MJ Surber, BS, R England, BS

**Affiliation:** Depts. of Anesthesiology and Pharmacology, Vanderbilt University, Nashville, TN 37232

**INTRODUCTION:** The mechanism of action of inhalational anesthetics is unknown, but neuronal membrane alteration is a favored hypothesis. Axelrod, Hirata and others<sup>1</sup> have demonstrated that enzymatic conversion (methylation) and translocation of inner membranal phosphatidylethanolamine (PE) to outer membranal phosphatidylcholine (PC) facilitates transduction of receptor-mediated signals through cell membranes. We recently have shown that PE methylation is doubled in brain synaptosomes taken from rats anesthetized with 1.4% halothane, returning to normal in rats allowed to recover.<sup>2</sup> We report here the effect of in vitro exposure of isolated synaptosomes to varying concentrations of halothane.

**METHODS:** Animal use was approved by the Animal Care Committee of Vanderbilt University. Male Sprague-Dawley rats weighing 285 to 460g were used. Synaptosomes were isolated from brain homogenates by differential centrifugation, as described by Cotman.<sup>3</sup> Methylation was measured by the incorporation of tritiated methyl groups from S-adenosyl-L-[<sup>3</sup>H-methyl]methionine (SAM) into PE.<sup>4</sup> The incubation mixture, consisting of 0.2mg of synaptosomal protein, buffers and 2 $\mu$ M <sup>3</sup>H-SAM, was exposed to varying concentrations of halothane for 30 min in a Dubnoff shaker. (Delivered halothane concentrations were confirmed by gas chromatography.) The methylated phospholipids were extracted with chloroform:methanol:HCl (2:1:0.02, v/v) and separated by thin layer chromatography. The activity of PE-N-methyltransferase, the rate limiting enzyme in transmethylation, was expressed by the amount

of phosphatidyl-N-methylethanolamine (PME) formed in fmol/mg protein/30 min.

**RESULTS AND DISCUSSION:** Halothane in concentrations of 1.0% and 1.4% increased PME ( $P < 0.01$ ) formation from  $495 \pm 27$  fmols (control,  $N=8$ ) to  $1594 \pm 107$  fmols ( $N=6$ ) and  $1562 \pm 68$  fmols ( $N=7$ ), respectively. Thus, halothane at 1.0-1.4% produced a three-fold increase in phospholipid methylation. Halothane concentration of 0.5% did not increase PME formation. PME formation was  $1006 \pm 47$  fmols ( $N=7$ ) and  $821 \pm 57$  fmols ( $N=7$ ), at halothane concentrations of 1.9 and 2.4%, respectively. These high concentrations of halothane caused significant but smaller increases in PME formations. These observations indicate that halothane exhibits a biphasic effect on PME formation. Halothane concentrations higher than 1.4% do seem to retard PME formation. Supported by the Study Center for Anesthesia Toxicology.

#### REFERENCES:

<sup>1</sup> *Science* 209: 1082-1090, 1980.

<sup>2</sup> *FASEB J* 4(4):A1007, 1990.

<sup>3</sup> *Methods in Enzymology*, Vol. 31, pp 445-452, 1974.

<sup>4</sup> *J Neurochem* 34: 1491-1498, 1980.
